# Supplementary material for: Polynuclear coordination compounds: a magnetostructural study of ferromagnetically coupled Ni4O4 cubane core motif
Source: Royal Society of Chemistry journal article supplement (doi:10.1039/c3ce41125g), 2013-12-04
Supplement: c3ce41125g.pdf [file c3ce41125g.pdf]

Electronic Supplementary Material (ESI) for CrystEngComm.

This journal is © The Royal Society of Chemistry 2013

## Polynuclear coordination compounds: A magnetostructural study of ferromagnetically coupled Ni<sub>4</sub>O<sub>4</sub> cubane core motif

Sibasree Karmakar, and Sumit Khanra\*

*Indian Institute of Science Education and Research (IISER) – Kolkata*

*BCKV Main Campus PO, Mohanpur, Nadia, WB 741252, India*

*E-mail: [sumit.khanra@iiserkol.ac.in](mailto:sumit.khanra@iiserkol.ac.in)*

---

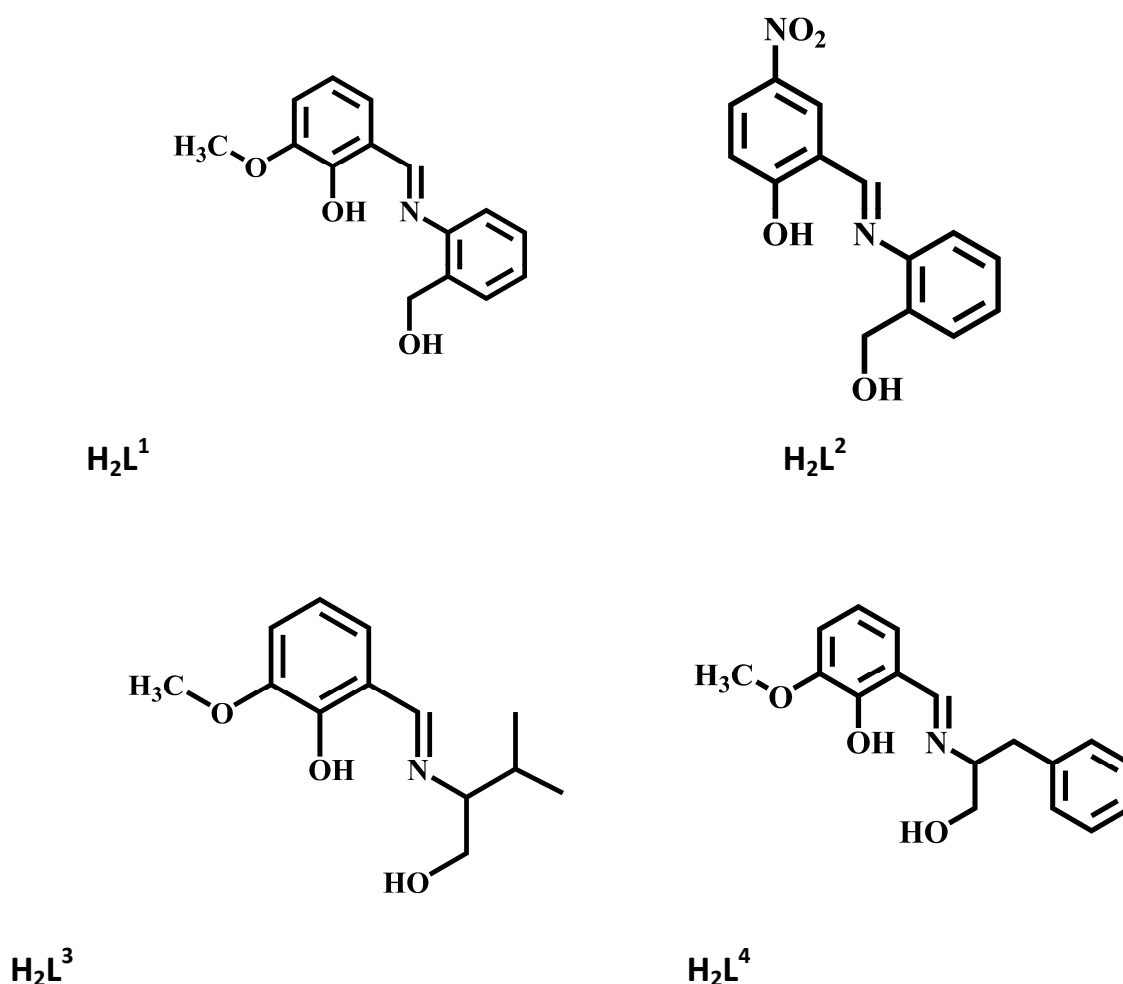

**Fig S1** Representation of the ligands

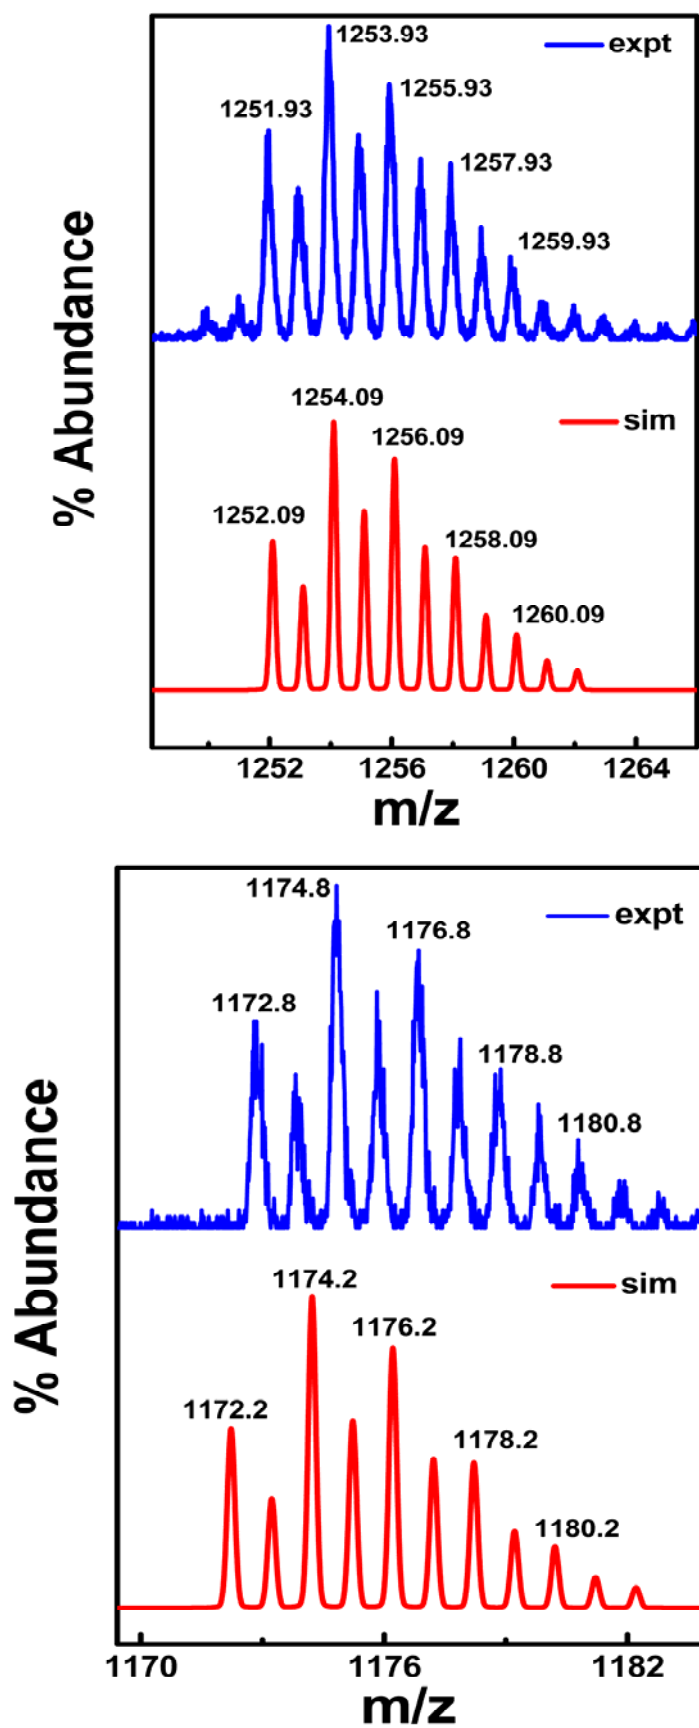

**Fig S2** Molecular ion peak in the ESI-MS spectrum for **1**(top) and **4**(bottom) with simulated and observed isotopic distributions.

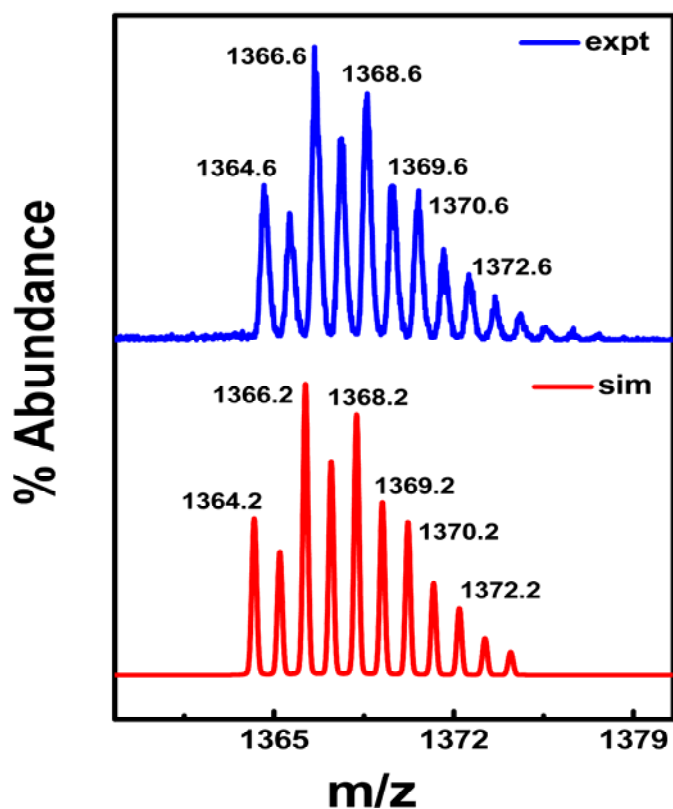

**Fig S3** Molecular ion peak in the ESI-MS spectrum for **5** with simulated and observed isotopic distributions.

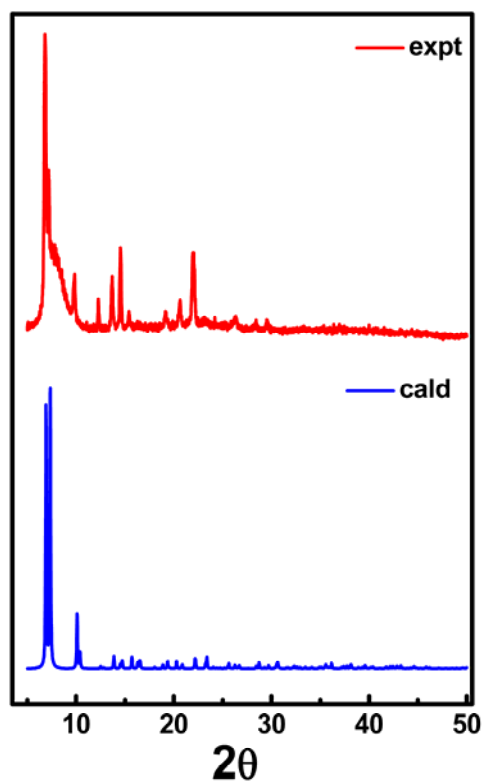

**Fig S4:** Experimental (red) and calculated (blue) powder XRD patterns of complex **1**.

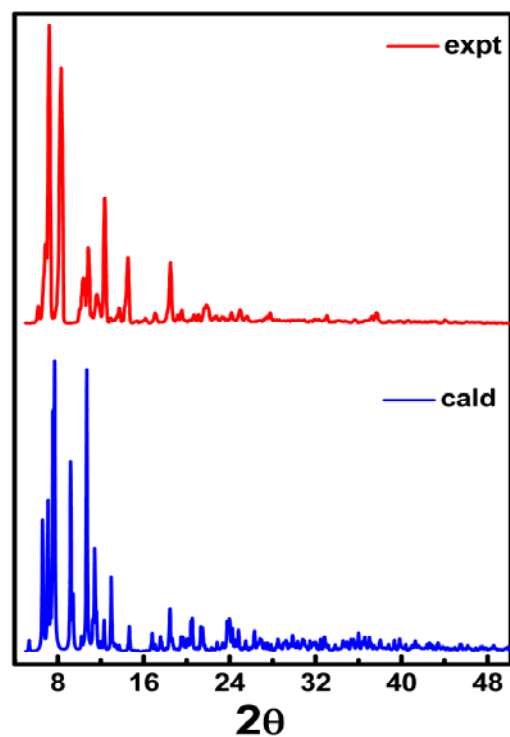

**Fig S5:** Experimental (red) and calculated (blue) powder XRD patterns of complex **2**.

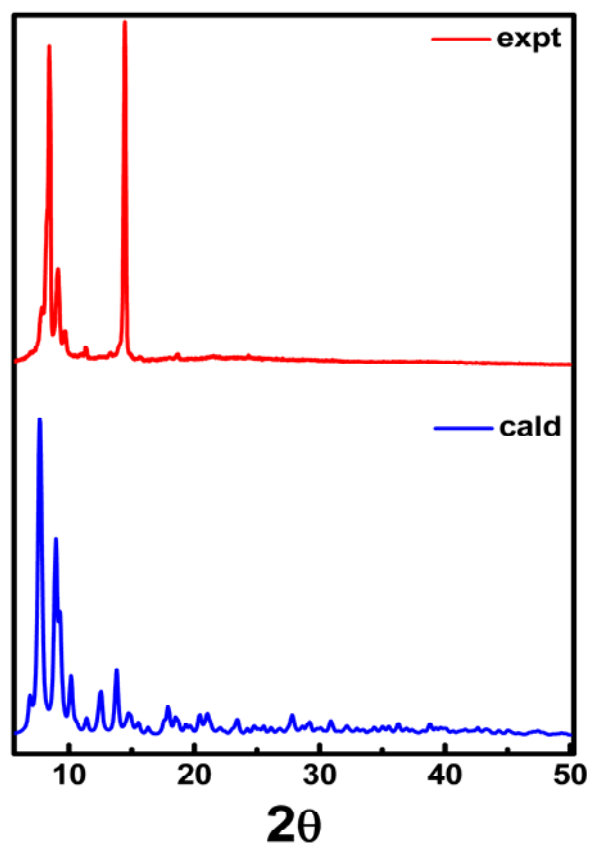

**Fig S6:** Experimental (red) and calculated (blue) powder XRD patterns of complex **3**.

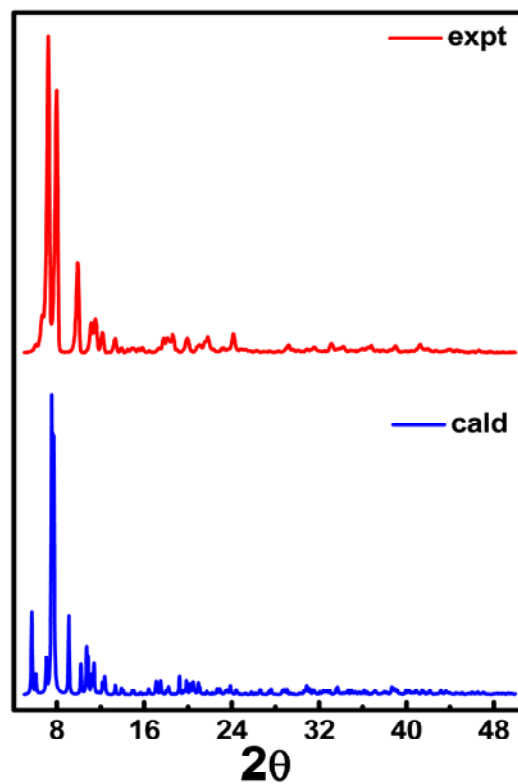

**Fig S7:** Experimental (red) and calculated (blue) powder XRD patterns of complex **4**.

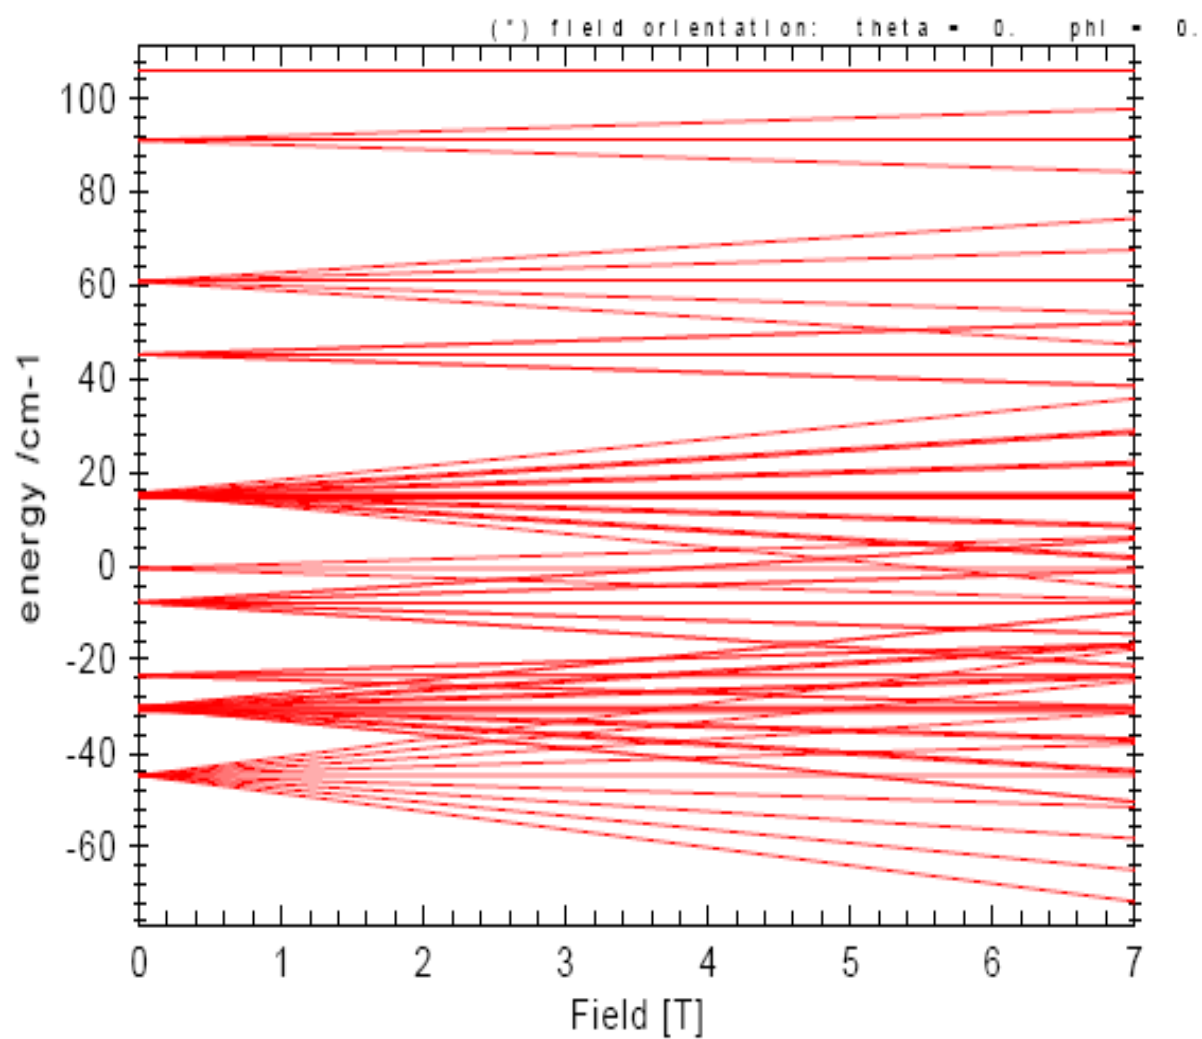

**Fig S8** Energy level calculation for **1** with parameters  $g = 2.06$ ,  $J_1 = -3.9 \text{ cm}^{-1}$ ,  $J_2 = +7.55 \text{ cm}^{-1}$ .

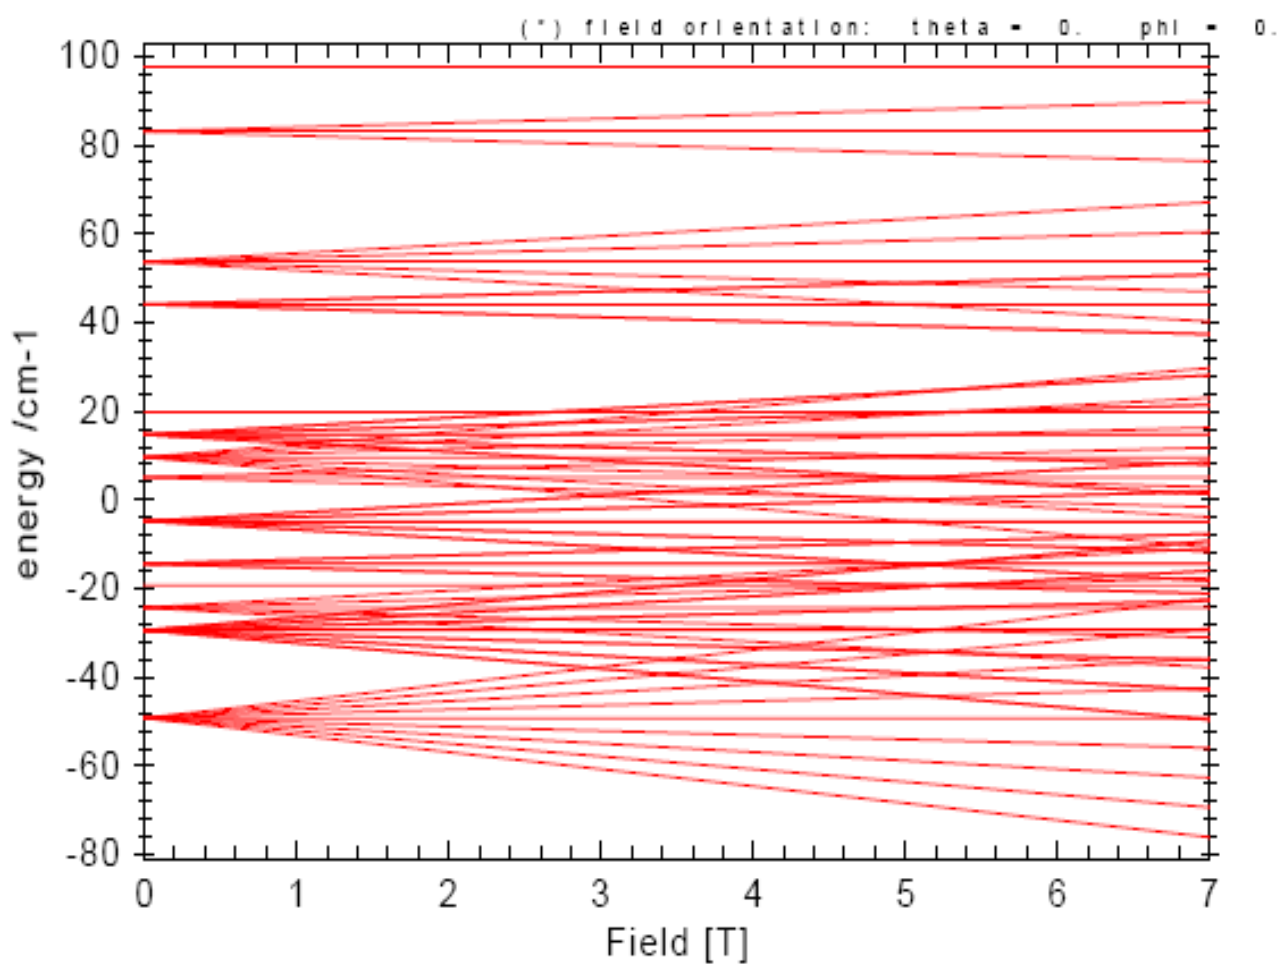

**Fig S9** Energy level calculation for **2** with parameters  $g = 2.055$ ,  $J_1 = -2.45 \text{ cm}^{-1}$ ,  $J_2 = +7.3 \text{ cm}^{-1}$ .

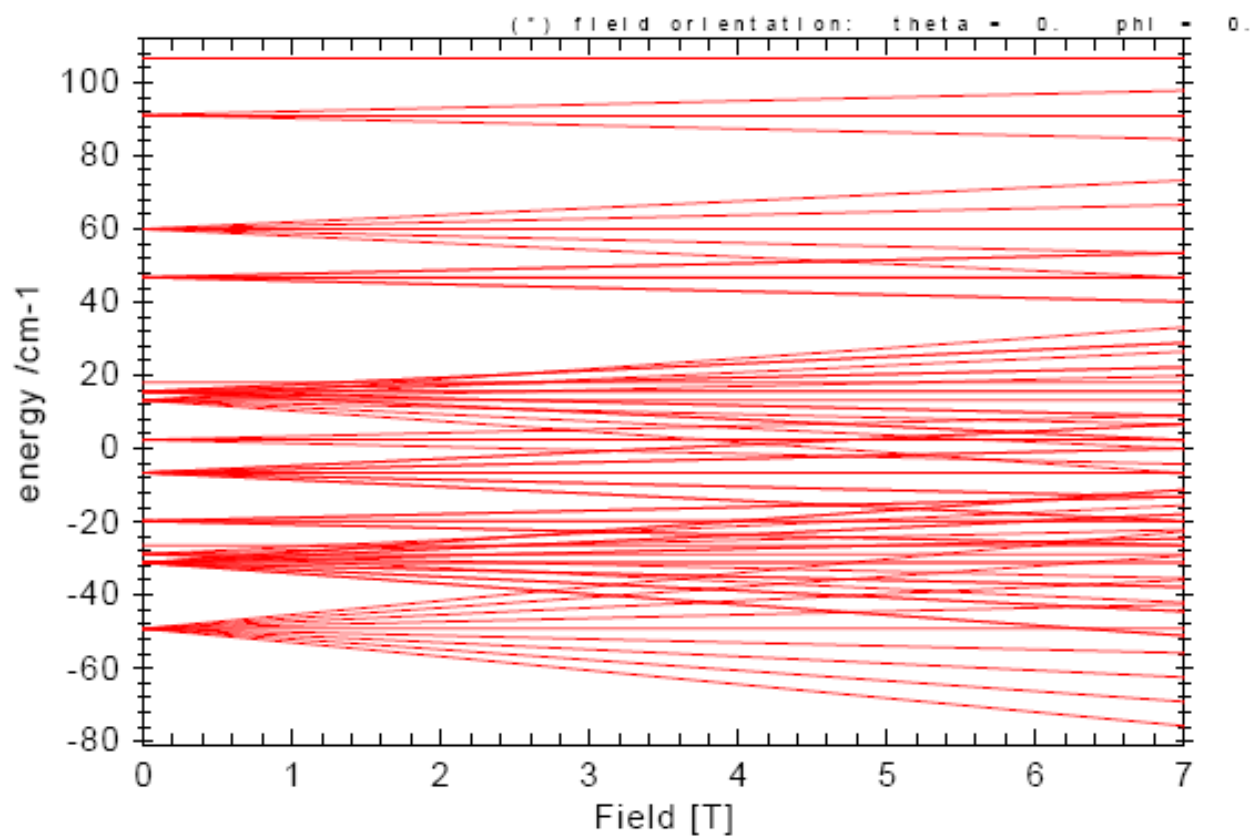

**Fig S10** Energy level calculation for **3** with parameters  $g = 2.045$ ,  $J_1 = -3.2 \text{ cm}^{-1}$ ,  $J_2 = +7.8 \text{ cm}^{-1}$ .

SK-213 Ni4  
cmnt: cubane

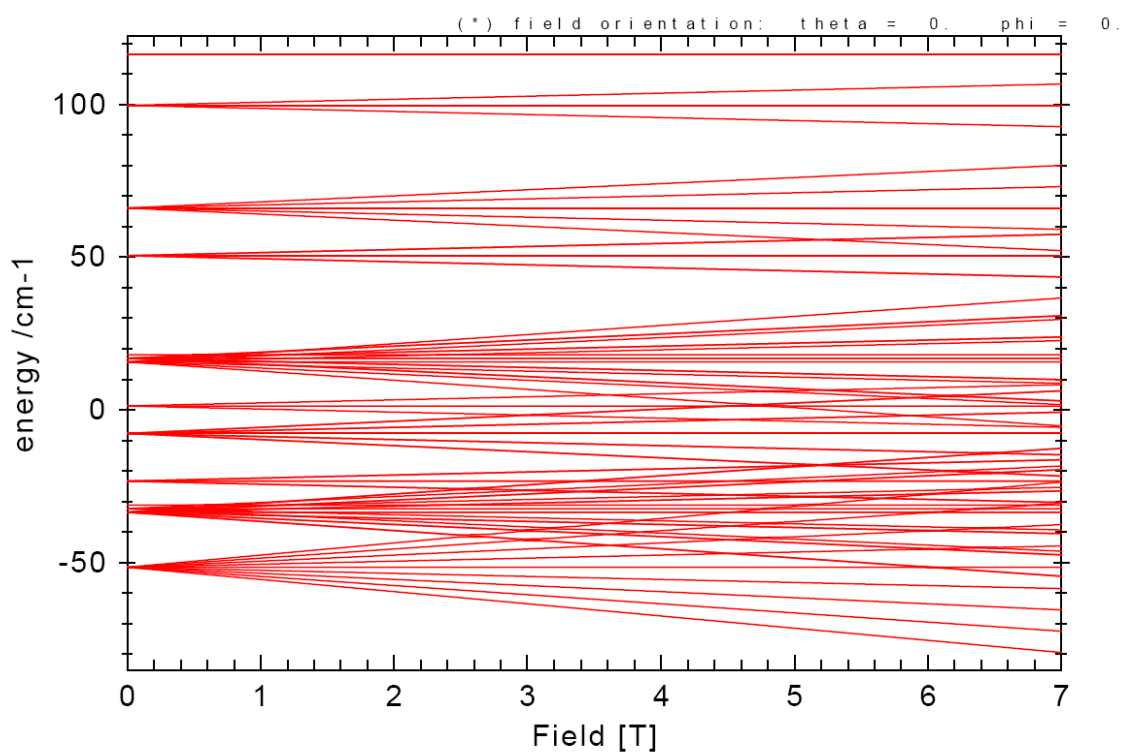

**Fig S11** Energy level calculation for **4** with parameters  $g = 2.13$ ,  $J_1 = -3.9 \text{ cm}^{-1}$ ,  $J_2 = +8.4 \text{ cm}^{-1}$ .

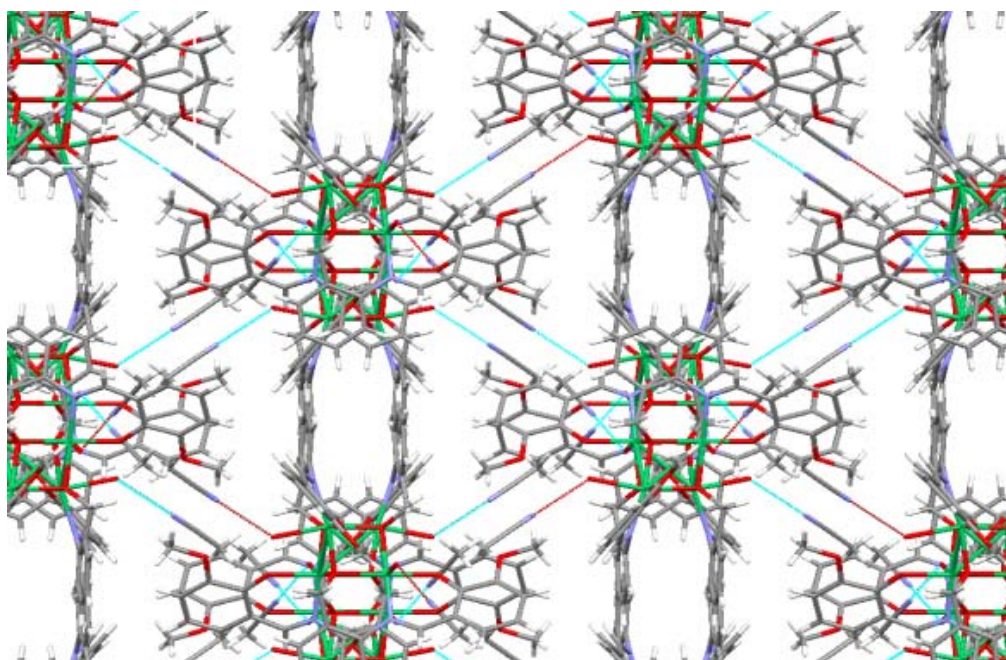

**Fig. S12:** A perspective view of the 3D packing of **1**; green lines represent hydrogen bonding.

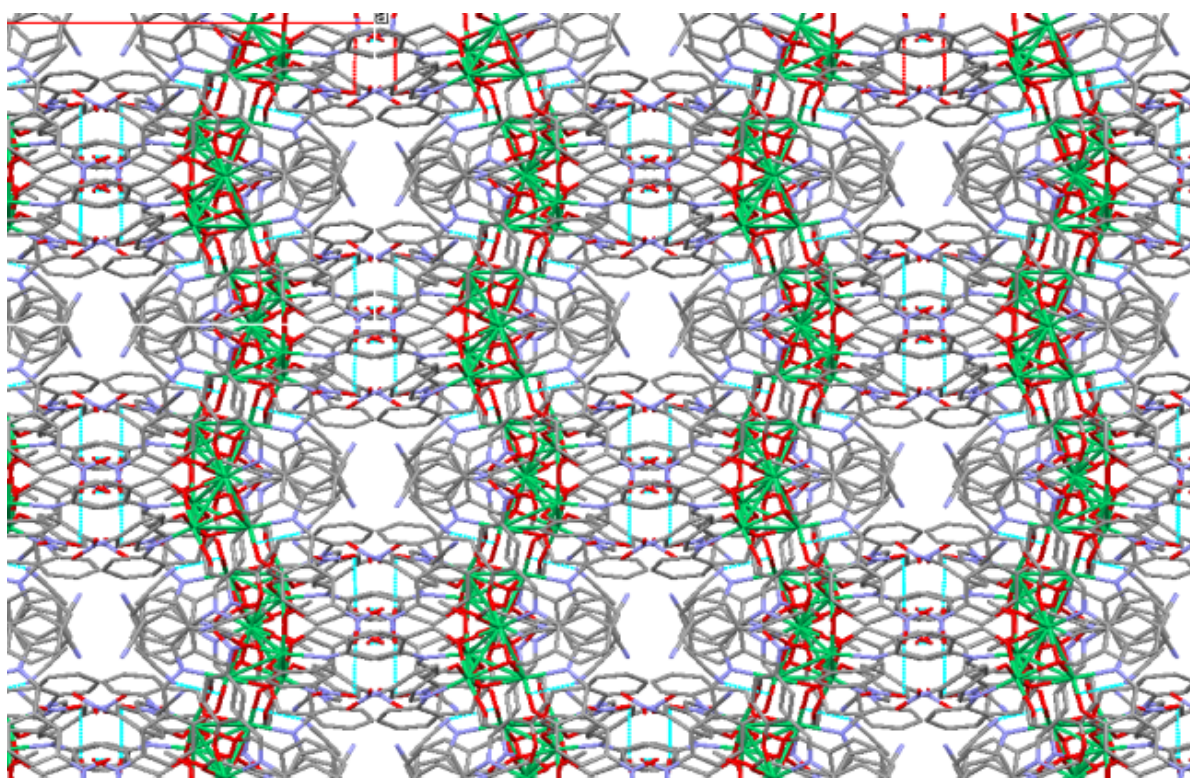

**Fig. S13:** A perspective view of the 3D packing of **2**; green lines represent hydrogen bonding.

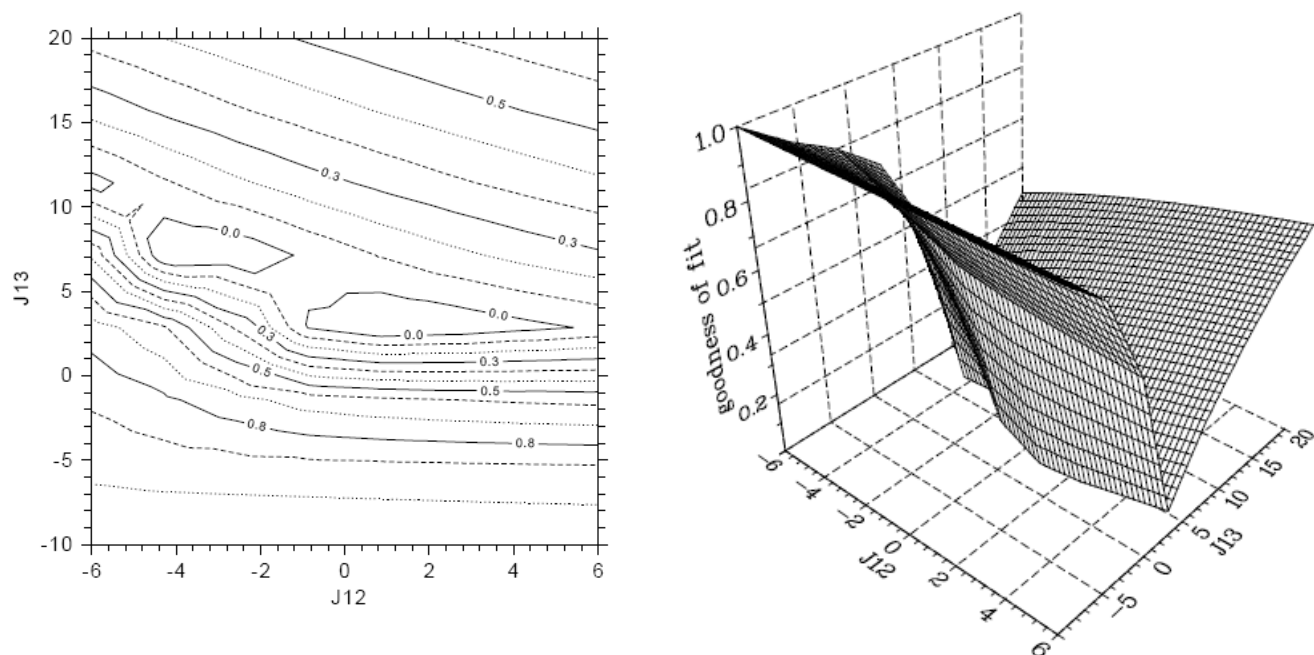

**Fig. S14:** 2D and 3D-contour projection of the relative error surface of fitting the magnetic data of **1**.

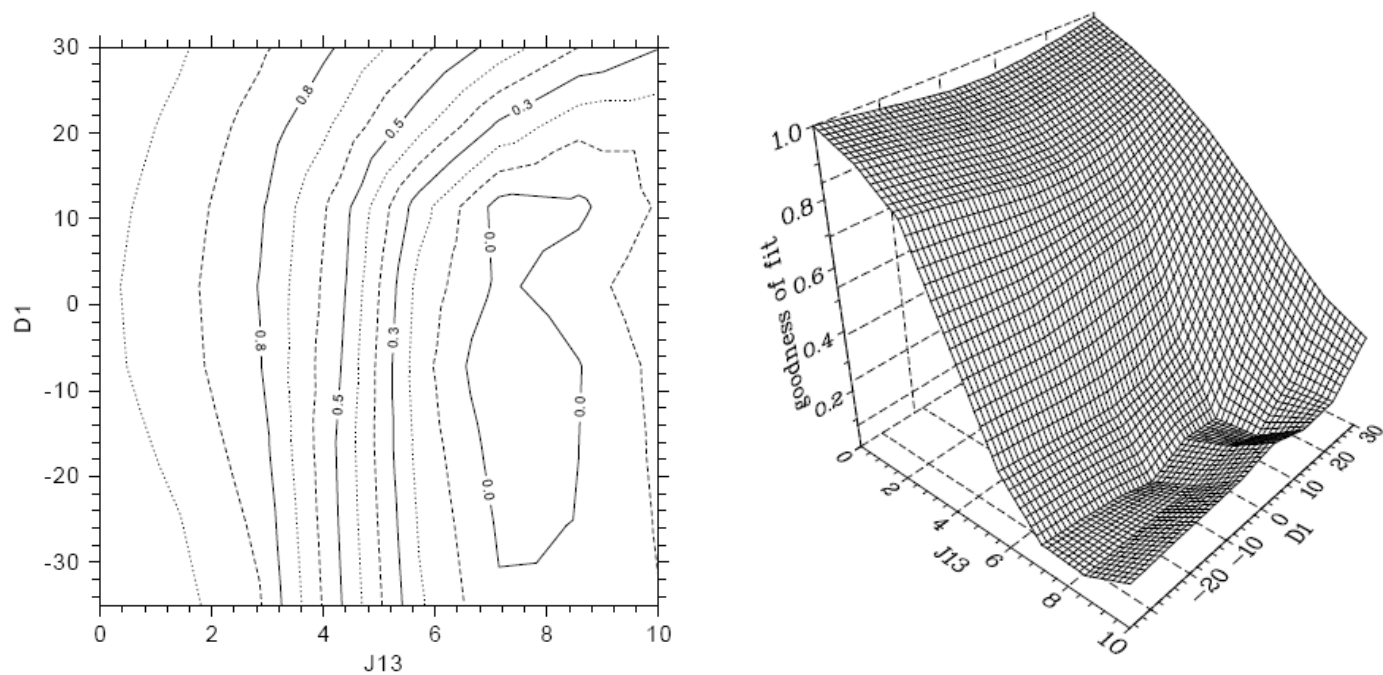

**Fig. S15:** 2D and 3D-contour projection of the relative error surface of fitting the magnetic data of **1**.

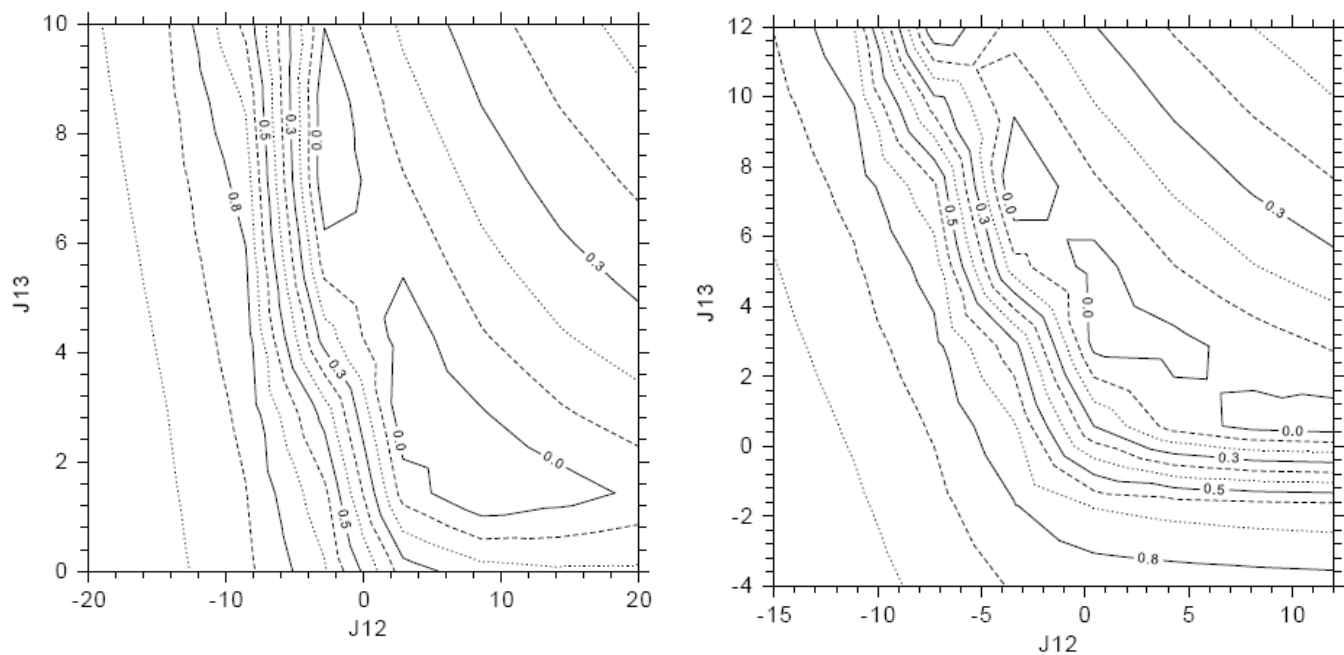

**Fig. S16:** 2D-contour projection of the relative error surface of fitting the magnetic data of **2** and **3**.

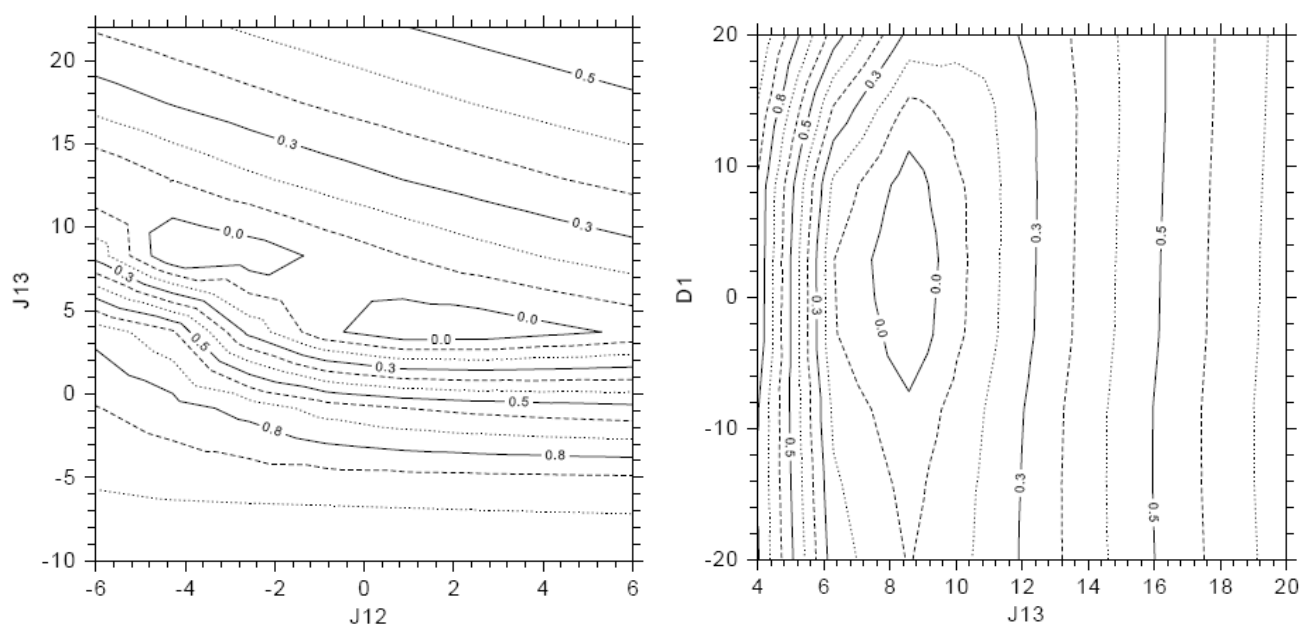

**Fig. S17:** 2D-contour projection of the relative error surface of fitting the magnetic data of **4**.

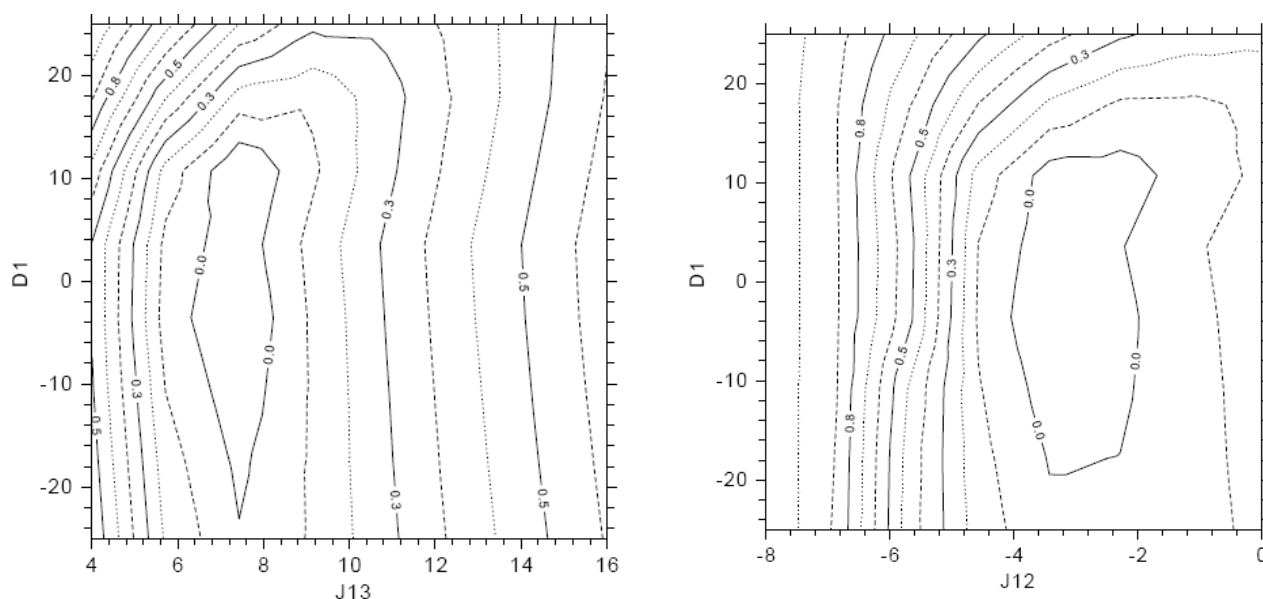

**Fig. S18:** 2D-contour projection of the relative error surface of fitting the magnetic data of **2**.

The magnetic data was also simulated by using additional parameter  $D$  based on the Hamiltonian noted below:

$$H = -2J_1 (S_1 \bullet S_2 + S_3 \bullet S_4) - 2J_2 (S_1 \bullet S_3 + S_1 \bullet S_4 + S_2 \bullet S_3 + S_2 \bullet S_4) + \sum D_{Ni} S_{iz}^2$$

The simulation yielded the parameters  $J_1 = -3.75 \text{ cm}^{-1}$ ,  $J_2 = +7.66 \text{ cm}^{-1}$ ,  $D_{Ni} = |4| \text{ cm}^{-1}$ ,  $g = 2.06$  for **1**;  $J_1 = -2.27 \text{ cm}^{-1}$ ,  $J_2 = +7.45 \text{ cm}^{-1}$ ,  $D_{Ni} = |4| \text{ cm}^{-1}$ ,  $g = 2.06$  for **2**;  $J_1 = -3.06 \text{ cm}^{-1}$ ,  $J_2 = +7.88 \text{ cm}^{-1}$ ,  $D_{Ni} = |4| \text{ cm}^{-1}$ ,  $g = 2.05$  for **3** and  $J_1 = -3.72 \text{ cm}^{-1}$ ,  $J_2 = +8.53 \text{ cm}^{-1}$ ,  $D_{Ni} = |4| \text{ cm}^{-1}$ ,  $g = 2.13$  for **4**.

**Table S1** for selected Bond Lengths (Å) and Angles (deg) for complex (**5**)

|                       |          |                       |          |
|-----------------------|----------|-----------------------|----------|
| Ni(1)●●●Ni(2)         | 3.038(1) | Ni(2)●●●Ni(3)         | 3.035(2) |
| Ni(1)●●●Ni(3)         | 3.159(2) | Ni(2)●●●Ni(4)         | 3.175(2) |
| Ni(1)●●●Ni(4)         | 3.037(1) | Ni(3)●●●Ni(4)         | 3.039(2) |
|                       |          |                       |          |
| Ni(1) - O(2)          | 1.979(6) | Ni(3) - O(3)          | 2.147(6) |
| Ni(1) - O(3)          | 1.996(6) | Ni(3) - O(6)          | 2.018(6) |
| Ni(1) - O(9)          | 2.143(6) | Ni(3) - O(8)          | 1.977(6) |
| Ni(1) - O(12)         | 2.032(6) | Ni(3) - O(9)          | 1.993(6) |
| Ni(1) - O(13)         | 2.172(7) | Ni(3) - O(15)         | 2.159(6) |
| Ni(1) - N(1)          | 1.988(8) | Ni(3) - N(3)          | 1.980(8) |
| Ni(2) - O(3)          | 2.065(6) | Ni(4) - O(6)          | 2.144(6) |
| Ni(2) - O(5)          | 1.959(6) | Ni(4) - O(9)          | 2.068(6) |
| Ni(2) - O(6)          | 1.993(6) | Ni(4) - O(11)         | 1.962(6) |
| Ni(2) - O(12)         | 2.136(6) | Ni(4) - O(12)         | 1.997(6) |
| Ni(2) - O(14)         | 2.165(6) | Ni(4) - O(16)         | 2.188(6) |
| Ni(2) - N(2)          | 1.999(8) | Ni(4) - N(4)          | 2.002(8) |
|                       |          |                       |          |
| Ni(1) - O(3) - Ni(2)  | 96.9(3)  | Ni(2) - O(3) - Ni(3)  | 92.2(2)  |
| Ni(1) - O(12) - Ni(2) | 93.6(3)  | Ni(2) - O(6) - Ni(3)  | 98.4(3)  |
| Ni(1) - O(3) - Ni(3)  | 99.3(3)  | Ni(2) - O(6) - Ni(4)  | 100.2(3) |
| Ni(1) - O(9) - Ni(3)  | 99.5(3)  | Ni(2) - O(12) - Ni(4) | 100.3(3) |
| Ni(1) - O(9) - Ni(4)  | 92.3(2)  | Ni(3) - O(6) - Ni(4)  | 93.8(2)  |
| Ni(1) - O(12) - Ni(4) | 97.8(3)  | Ni(3) - O(9) - Ni(4)  | 96.9(3)  |
|                       |          |                       |          |
| O(2) - Ni(1) - O(3)   | 171.6(3) | O(8) - Ni(3) - O(9)   | 171.8(3) |
| O(5) - Ni(2) - O(6)   | 168.5(3) | O(11) - Ni(4) - O(12) | 166.7(3) |
